# Supplementary material for: A Longitudinal Study of Hematology and Stress Biomarker Profiles in Young Asian Elephants (Elephas Maximus) in Relation to Elephant Endotheliotropic Herpesvirus (EEHV) in Thailand
Source: MDPI journal article supplement (doi:10.3390/ani11092530), 2021-08-28
Supplement: s1 [file s1]

| Season | ID | Groups       | Status     | PCV (%) | RBC (x 106 cells/ul) | WBC (cells/ul) | Heterophil (cells/ul) | Lymphocyte (cells/ul) |
|--------|----|--------------|------------|---------|----------------------|----------------|-----------------------|-----------------------|
| Winter | E1 | Normal value | Prior EEHV | 43.80   | 3.46                 | 20116.20       | 7587.40               | 11869.80              |
| Winter | E2 | Normal value | Non EEHV   | 35.00   | 2.99                 | 19364.00       | 5051.20               | 11978.20              |
| Winter | E3 | Normal value | Prior EEHV | 39.60   | 3.32                 | 17274.00       | 2920.80               | 10703.20              |
| Winter | E4 | Normal value | Prior EEHV | 35.40   | 2.84                 | 16322.00       | 4482.00               | 7137.40               |
| Winter | E5 | EEHV-HD      | Prior EEHV | 32.50   | 3.05                 | 19232.50       | 5819.25               | 9833.25               |
| Winter | E6 | Normal value | Prior EEHV | 38.00   | 3.12                 | 16214.00       | 3453.00               | 9166.60               |
| Winter | E7 | Normal value | Prior EEHV | 37.38   | 3.13                 | 18087.12       | 4885.61               | 10114.74              |
| Winter | E8 | Normal value | Non EEHV   | 37.38   | 3.13                 | 18087.12       | 4885.61               | 10114.74              |
| Winter | E9 | Normal value | Non EEHV   | 37.80   | 3.04                 | 21622.00       | 3685.00               | 13980.20              |
| Summer | E1 | Normal value | Prior EEHV | 43.00   | 3.47                 | 15920.00       | 4367.00               | 8293.00               |
| Summer | E2 | Normal value | Non EEHV   | 32.25   | 2.81                 | 21990.00       | 4316.75               | 13421.50              |
| Summer | E3 | Normal value | Prior EEHV | 37.68   | 3.11                 | 19844.00       | 4122.92               | 11898.23              |
| Summer | E4 | Normal value | Prior EEHV | 36.25   | 2.89                 | 14810.00       | 5558.75               | 6918.00               |
| Summer | E5 | EEHV-HD      | Prior EEHV | 25.25   | 2.31                 | 11130.00       | 2978.00               | 6207.75               |
| Summer | E6 | Normal value | Prior EEHV | 36.25   | 2.97                 | 18330.00       | 5230.00               | 7116.75               |
| Summer | E7 | Normal value | Prior EEHV | 33.54   | 2.81                 | 17220.80       | 4441.28               | 9112.45               |
| Summer | E8 | Normal value | Non EEHV   | 33.79   | 2.82                 | 16266.96       | 4466.19               | 8250.64               |
| Summer | E9 | Normal value | Non EEHV   | 33.02   | 2.76                 | 15551.55       | 4534.84               | 7521.12               |
| Rainy  | E1 | Normal value | Prior EEHV | 40.25   | 3.17                 | 17157.50       | 3486.75               | 9989.50               |
| Rainy  | E2 | Normal value | Non EEHV   | 33.25   | 2.71                 | 17747.50       | 4033.50               | 10383.50              |
| Rainy  | E3 | Normal value | Prior EEHV | 35.51   | 2.88                 | 16818.85       | 4018.36               | 9298.04               |
| Rainy  | E4 | Normal value | Prior EEHV | 36.34   | 2.92                 | 17241.28       | 3846.20               | 9890.35               |
| Rainy  | E5 | EEHV-HD      | Prior EEHV | NA      | NA                   | NA             | NA                    | NA                    |
| Rainy  | E6 | Normal value | Prior EEHV | 36.34   | 2.92                 | 17241.28       | 3846.20               | 9890.35               |
| Rainy  | E7 | Normal value | Prior EEHV | 35.36   | 2.86                 | 17262.23       | 3936.07               | 9865.56               |
| Rainy  | E8 | Normal value | Non EEHV   | 35.88   | 2.89                 | 17140.91       | 3911.71               | 9736.07               |
| Rainy  | E9 | Normal value | Non EEHV   | 35.25   | 2.86                 | 17597.50       | 3746.00               | 10618.00              |

| Monocyte (cells/ul) | Eosinophil (cells/ul) | Platelet (x 103 cells/ul) | M:H ratio | SC (ng/ml) | FGM (ng/ml) | SIgA (µg/ml) | FIgA (µg/ml) |
|---------------------|-----------------------|---------------------------|-----------|------------|-------------|--------------|--------------|
| 3137.60             | 295.80                | 553.40                    | 0.41      | 1.66       | 23.55       | 1.41         | 2.10         |
| 5578.80             | 348.80                | 427.60                    | 1.10      | 0.79       | 33.35       | 5.89         | 4.63         |
| 3415.60             | 198.00                | 428.60                    | 1.17      | 0.94       | 27.24       | 2.49         | 2.37         |
| 4599.20             | 103.60                | 453.20                    | 1.03      | 1.95       | 33.36       | 2.12         | 1.95         |
| 3218.00             | 362.00                | 602.75                    | 0.55      | 1.07       | 52.13       | 4.81         | 6.13         |
| 3093.60             | 501.00                | 374.00                    | 0.90      | 1.54       | 23.92       | 1.28         | 2.30         |
| 3840.47             | 301.53                | 473.26                    | 0.79      | 1.32       | 32.26       | 3.00         | 3.25         |
| 3840.47             | 301.53                | 473.26                    | 0.79      | 1.32       | 32.26       | 3.00         | 3.25         |
| 3796.00             | 161.00                | 429.80                    | 1.03      | 0.92       | 53.51       | 5.13         | 4.36         |
| 2694.50             | 535.25                | 553.00                    | 0.62      | 1.49       | 32.63       | 2.78         | 3.19         |
| 3173.00             | 219.25                | 469.00                    | 0.74      | 0.65       | 45.81       | 5.07         | 9.04         |
| 3221.17             | 305.17                | 483.93                    | 0.78      | 1.02       | 43.99       | 4.33         | 5.53         |
| 2316.00             | 0.00                  | 433.75                    | 0.42      | 1.33       | 51.42       | 3.09         | 3.56         |
| 1838.50             | 106.00                | 394.75                    | 0.62      | 0.42       | 41.85       | 2.50         | 2.62         |
| 3453.75             | 413.50                | 398.00                    | 0.66      | 1.55       | 37.41       | 4.08         | 2.32         |
| 2800.48             | 208.78                | 435.89                    | 0.63      | 0.99       | 44.09       | 3.81         | 4.61         |
| 2725.98             | 206.69                | 429.26                    | 0.61      | 1.06       | 43.75       | 3.56         | 3.73         |
| 2626.94             | 186.99                | 418.33                    | 0.58      | 1.07       | 43.70       | 3.41         | 3.37         |
| 3346.00             | 291.00                | 550.75                    | 0.96      | 1.05       | 37.72       | 3.71         | 2.01         |
| 2698.25             | 395.00                | 471.75                    | 0.67      | 0.72       | 29.07       | 12.60        | 1.33         |
| 2890.40             | 291.00                | 480.28                    | 0.72      | 0.95       | 36.83       | 6.57         | 2.24         |
| 2978.22             | 325.67                | 500.93                    | 0.77      | 0.91       | 34.54       | 7.63         | 1.86         |
| NA                  | NA                    | NA                        | NA        | NA         | NA          | NA           | NA           |
| 2978.22             | 325.67                | 500.93                    | 0.77      | 0.91       | 34.54       | 7.63         | 1.86         |
| 2886.27             | 334.33                | 488.47                    | 0.73      | 0.87       | 33.75       | 8.61         | 1.82         |
| 2933.27             | 319.17                | 492.65                    | 0.75      | 0.91       | 34.91       | 7.61         | 1.94         |
| 2909.25             | 276.75                | 401.00                    | 0.78      | 0.73       | 25.48       | 3.19         | 1.81         |
